# Supplementary material
Source: Elsevier journal article supplement (https://comptes-rendus.academie-sciences.fr/chimie/article/10.1016/j.crci.2008.04.001/file/attach/mmc1.pdf)
Supplement: mmc1 [file mmc1.pdf]

## Supplementary material

### Tuning the electronic properties of $\text{Fe}_2(\mu\text{-arenedithiolate})(\text{CO})_{6-n}(\text{PMe}_3)_n$ ( $n=0, 2$ ) complexes related to the [Fe-Fe]-hydrogenase active site

Lennart Schwartz<sup>a</sup>, Pradyumna S. Singh<sup>a</sup>, Lars Eriksson<sup>b</sup>, Reiner Lomoth<sup>a</sup>, Sascha Ott<sup>\*a</sup>

<sup>a</sup>Department of Photochemistry and Molecular Science, Uppsala University, Box 523, 751 20 Uppsala, Sweden.

E-mail: Sascha.Ott@fotomol.uu.se

<sup>b</sup>Division of Structural Chemistry, Arrhenius Laboratory, Stockholm University, 106 91 Stockholm, Sweden

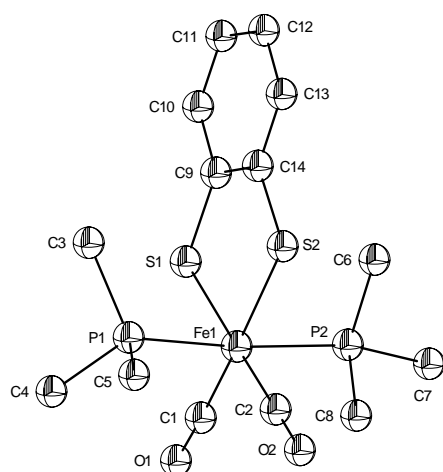

**Figure 1.** Thermal ellipsoid representations (50% probability) of the molecular structure of  $[\text{Fe}(1,2\text{-benzenedithiolate})(\text{CO})_2(\text{PMe}_3)_2]$  (**1c**).

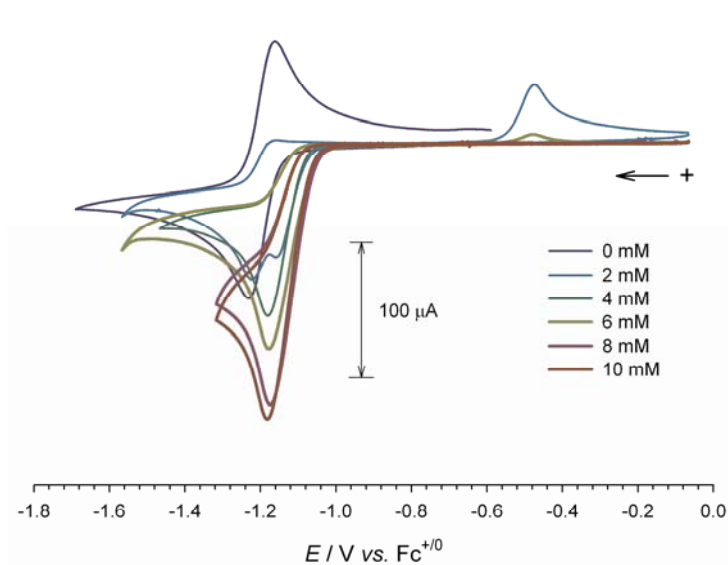

**Figure 2.** Cyclic voltammograms ( $\nu = 100$  mV/s) of complex **3a** (2 mM) on glassy carbon electrode in  $\text{CH}_3\text{CN}$  (0.1 M  $(\text{Bu})_4\text{NPF}_6$ ) solution with trifluoromethanesulfonic acid (0-10 mM).

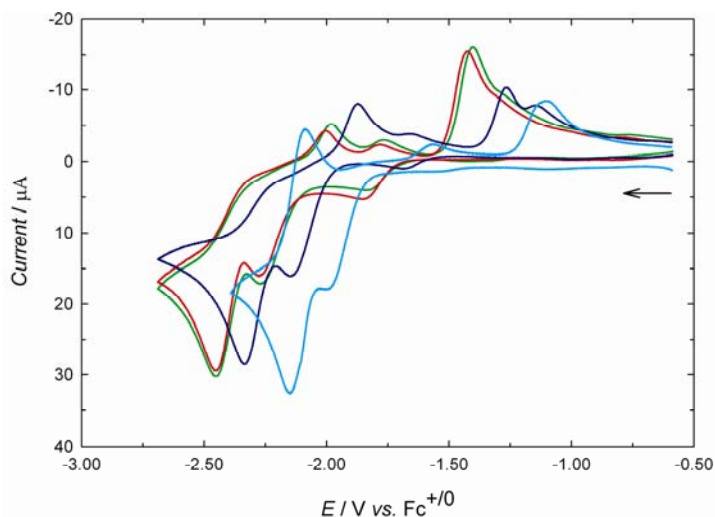

**Figure 3.** Cyclic voltammograms ( $v = 100$  mV/s) of **1c** (1.22 mM, green trace), **2c** (1.13 mM, red trace), **3c** (1.14 mM, blue trace) and **7c** (1.03 mM, cyan trace) in acetonitrile (0.1 M  $(\text{Bu})_4\text{NPF}_6$ ).

**Table 1.** Cyclic voltammetric data (vs.  $\text{Fc}^{+/0}$ ) for **1c**, **2c**, **3c** and **7c** at  $v = 100$  mV/s in MeCN, containing 0.1 M  $(\text{Bu})_4\text{NPF}_6$ .

|             | <b>1c</b>    | <b>2c</b>    | <b>3c</b>     | <b>7c</b>    |
|-------------|--------------|--------------|---------------|--------------|
| $E_p^c$ (V) | -2.26, -2.45 | -2.27, -2.45 | -2.15, -2.34) | -2.00, -2.17 |

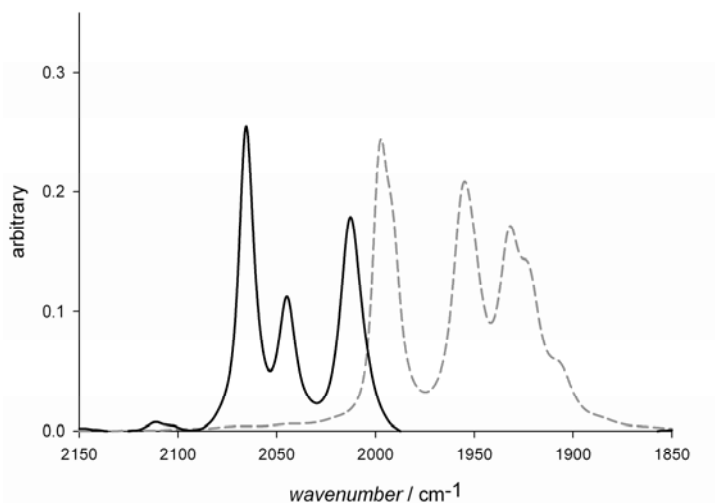

**Figure 4.** Carbonyl region of the IR spectra obtained for acetonitrile solutions of **3b** (grey, dashed trace) and  $[(\mu\text{-H})\mathbf{3b}]^+$ , prepared from **3b** with 10 equivalents of trifluoromethanesulfonic acid (black, solid trace).
